# Supplementary material
Source: HighWire-hosted journal article supplement (https://ard.bmj.com/content/78/10/1357)

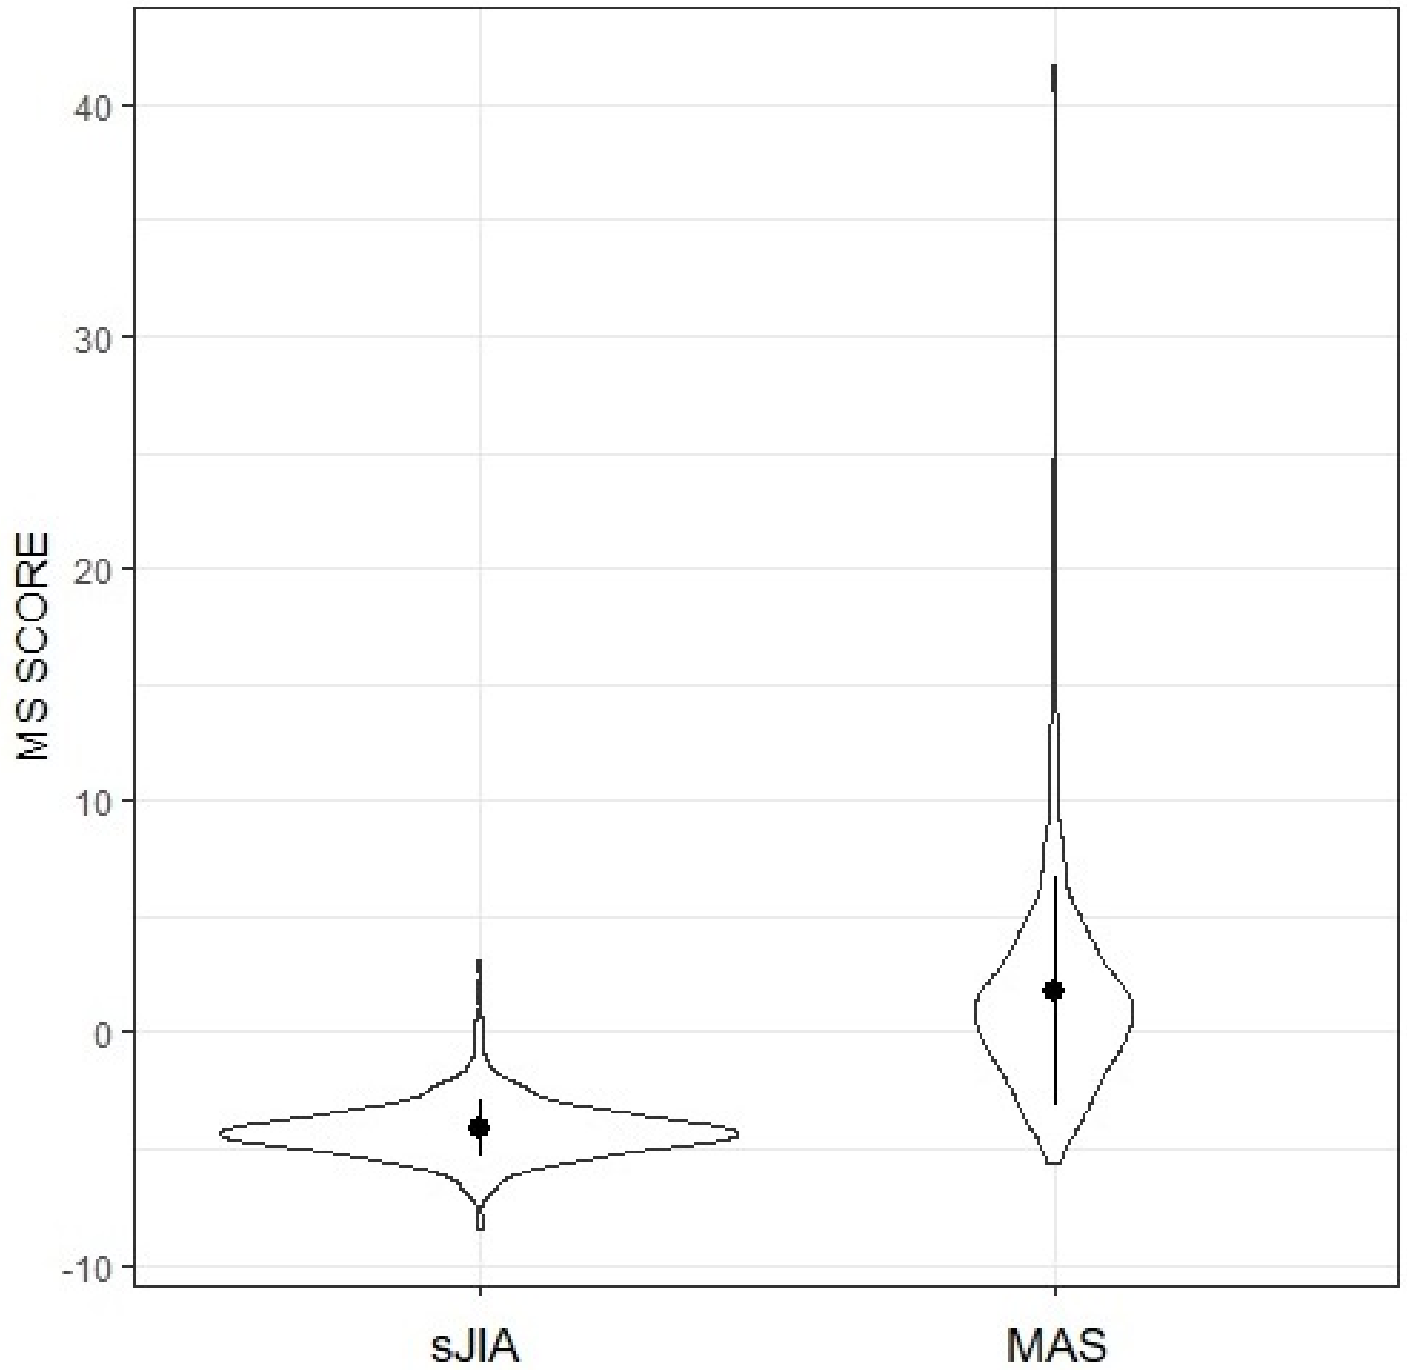

Supplement: inline-supplementary-material-5 [file inline-supplementary-material-5.pdf]
